# Supplementary material
Source: PubMed Central journal article supplement (PMC3312535)
Supplement: 10.4300_JGME-04-01-58.s1.pdf [file 10.4300_JGME-04-01-58.s1.pdf]

## Appendix (Survey)

### Developing and Evaluating SMaRT: SBIRT Medical and Residency Training in Medical Residency

#### Person Completing the Survey

FIRST Name                      LAST Name

Residency Facility

#### Curriculum

1. Are you using a formal curriculum?
  - Yes
  - No
  
2. If Yes to Question 1, what are the components of the curriculum (check all that are true)?
  - Overview of the Public Health Issues Associated with Hazardous Alcohol and Drug Use
  - Basic Information on What Constitutes Abuse/Dependence
  - Drinker's Pyramid
  - Screening Tools
  - Brief Intervention Approaches
  - Referral to Treatment Approaches
  - Implementation Approaches
  - Other:
  - Other:
  
3. How many hours of training do you require in your program?
  
4. What are the methods of delivery?
  - On Line Only
  - Face to Face Only
  - On Line AND Face to Face
  - Other:
  
5. Do you incorporate motivational interviewing principles in your training program?
  - Yes
  - No
  
6. What screening instruments do you use in your training program?
  - AUDIT-C
  - DAST
  - ASSIST
  - TWEAK
  - CAGE
  - Other:
  - Other:
  
7. Do you incorporate tobacco in your program?
  - Yes
  - No
  
8. Do you incorporate drug abuse in your program?
  - Yes
  - No
  
9. Do you use a published curriculum?
  - Yes
  - No

## **Training and Implementation**

1. What types (medical specialties) of residents are being trained?
2. What levels of residents are being trained?
  - PGY1
  - PGY2
  - PGY3
3. Are residents using SBIRT in practice?
  - Yes
  - No
4. If yes to Question 3, how are you measuring the use of SBIRT in practice?
  - Screens
  - EMR
  - Other Method
5. Have you used your curriculum with Medical Students?
  - Yes
  - No
6. If No to Question 5, do you plan to do so?
  - Yes
  - No
7. What other health personnel (nursing, pharmacy, dentistry) have been/are being trained as part of your project?
  - Nurses
  - Pharmacists
  - Dentists
  - Other
8. What training resources do you find most valuable?
  - Literature
  - SAMHSA resources
  - NIDA/NIAAA resources
  - Other SAMHSA resources:
  - Other:
8. How many residents will you train?
  - by now
  - by the end of your grant

## **Barriers and Lessons Learned**

1. Describe challenges that your program has faced/is facing
2. Describe any lessons your program has learned thus far from these challenges.
3. Describe ways your training program could be spread and used by other residency/medical school programs nationwide.
